# Supplementary material for: Heteroatom-assisted oxygen vacancies in cerium oxide catalysts for efficient synthesis of dimethyl carbonate from CO2 and methanol
Source: Royal Society of Chemistry journal article supplement (doi:10.1039/d4cy00702f), 2024-01-01
Supplement: d4cy00702f1.pdf [file d4cy00702f1.pdf]

## Electronic Supplementary Information

### Heteroatom-assisted oxygen vacancies in cerium oxide catalysts for efficient synthesis of dimethyl carbonate from CO<sub>2</sub> and methanol

Niladri Maity,<sup>a,\*</sup> Samiyah A. Al-Jendan,<sup>a</sup> Samir Barman,<sup>a</sup> Nagendra Kulal<sup>a</sup> and E. A. Jaseer<sup>a</sup>

<sup>a</sup>Interdisciplinary Research Center for Refining and Advanced Chemicals, King Fahd University for Petroleum & Minerals, Dhahran31261, Saudi Arabia. E-mail: niladri.maity@kfupm.edu.sa

| Table of contents |                                                                                                                                                   |          |
|-------------------|---------------------------------------------------------------------------------------------------------------------------------------------------|----------|
| Sl. No.           | Contents                                                                                                                                          | Page No. |
| 1                 | Elemental microanalysis of the synthesized CeO <sub>2</sub> nanomaterials                                                                         | S2       |
| 2                 | Crystallite size calculation from PXRD                                                                                                            | S2       |
| 3                 | Oxygen vacancy concentration data from RAMAN spectra                                                                                              | S3       |
| 4                 | N <sub>2</sub> adsorption-desorption isotherm of CeO <sub>2</sub> -NP                                                                             | S3       |
| 5                 | TEM image and lattice spacings of CeO <sub>2</sub> -NP                                                                                            | S4       |
| 6                 | CO <sub>2</sub> -and NH <sub>3</sub> -TPD plots for CeO <sub>2</sub> -NP                                                                          | S4       |
| 7                 | O1s binding energy spectra                                                                                                                        | S5       |
| 8                 | Surface basicity and acidity data of the CeO <sub>2</sub> nanomaterials from CO <sub>2</sub> - and NH <sub>3</sub> -TPD                           | S5       |
| 9                 | Performances of CeO <sub>2</sub> -NP, CeO <sub>2</sub> -NR, S-CeO <sub>2</sub> -NR, N-CeO <sub>2</sub> -NR towards the catalytic synthesis of DMC | S6-S8    |
| 10                | Formation of side products methyl picolinate and methyl carbamate during the synthesis of DMC                                                     | S8       |
| 11                | Representative <sup>1</sup> H NMR spectra of standard compounds and the reaction mixture                                                          | S9-11    |
| 12                | The plot of surface acidity and basicity vs catalytic efficiency                                                                                  | S12      |
| 13                | Proposed reaction mechanism                                                                                                                       | S12      |

## 1. Elemental microanalysis of the synthesized CeO<sub>2</sub> nanomaterials

Table S1: Elemental microanalysis of cerium nanomaterials

| Compound               | Temperature<br>(°C) | Wt. (%) |      |
|------------------------|---------------------|---------|------|
|                        |                     | N       | S    |
| CeO <sub>2</sub> -NR   | 80                  | -       | -    |
| CeO <sub>2</sub> -NR   | 600                 | -       | -    |
| S-CeO <sub>2</sub> -NR | 80                  | -       | 0.46 |
| S-CeO <sub>2</sub> -NR | 600                 | -       | 0.18 |
| N-CeO <sub>2</sub> -NR | 80                  | 0.30    | -    |
| N-CeO <sub>2</sub> -NR | 600                 | 0.20    | -    |

## 2. Crystallite size calculation from PXRD.

Table S2: Crystallite size measured from PXRD for the CeO<sub>2</sub> nanomaterials.

| Materials              | Crystallite<br>size (nm) |                    |                    |                    |
|------------------------|--------------------------|--------------------|--------------------|--------------------|
|                        | (111) <sup>a</sup>       | (200) <sup>b</sup> | (220) <sup>c</sup> | (311) <sup>d</sup> |
| CeO <sub>2</sub> -NR   | 10.4                     | 9.63               | 10.4               | 9.2                |
| S-CeO <sub>2</sub> -NR | 9.9                      | 9.0                | 9.5                | 8.9                |
| N-CeO <sub>2</sub> -NR | 10.1                     | 9.9                | 10.6               | 10.0               |
| CeO <sub>2</sub> -NP   | 17.6                     | 18.9               | 17.8               | 17.4               |

Estimated from <sup>a</sup>(111) plane, <sup>b</sup>(111), <sup>c</sup>(111) and <sup>d</sup>(111) of PXRD analysis.

### 3. Oxygen vacancy concentration data from RAMAN spectra

Table S3: Oxygen vacancy concentrations data

| Compound               | Oxygen vacancy concentration<br>( $\times 10^{13}$ vacancies $\text{cm}^{-3}$ ) |
|------------------------|---------------------------------------------------------------------------------|
| CeO <sub>2</sub> -NP   | 1.51                                                                            |
| CeO <sub>2</sub> -NR   | 4.59                                                                            |
| S-CeO <sub>2</sub> -NR | 5.56                                                                            |
| N-CeO <sub>2</sub> -NR | 6.34                                                                            |

### 4. N<sub>2</sub> adsorption-desorption isotherm of CeO<sub>2</sub>-NP

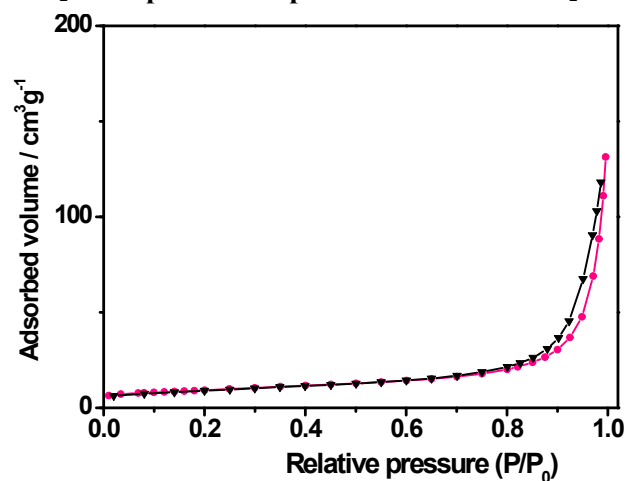

Fig. S1 N<sub>2</sub> adsorption-desorption isotherm of CeO<sub>2</sub>-NP.

## 5. TEM image and lattice spacings of CeO<sub>2</sub>-NP

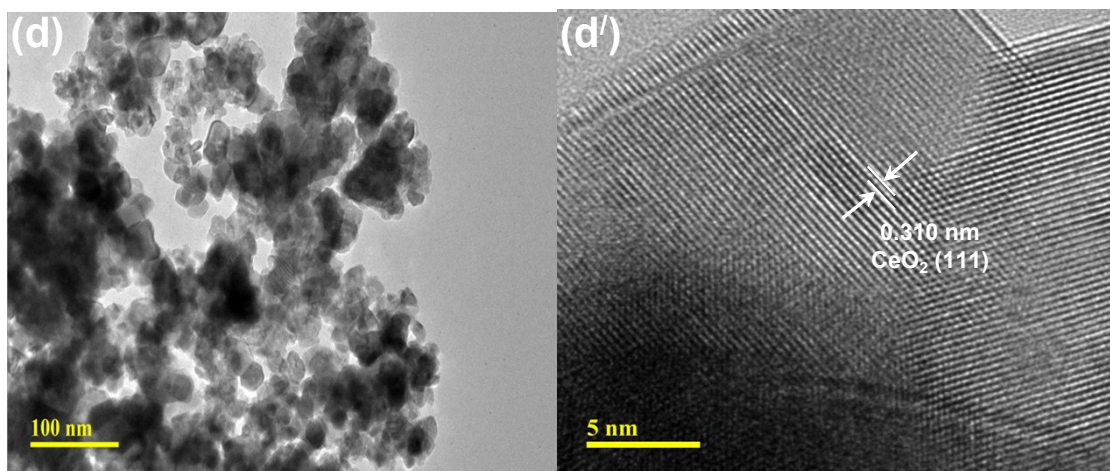

Fig. S2 (a) TEM image and (b) lattice spacings for CeO<sub>2</sub>-NP.

## 6. CO<sub>2</sub>-and NH<sub>3</sub>-TPD plots for CeO<sub>2</sub>-NP.

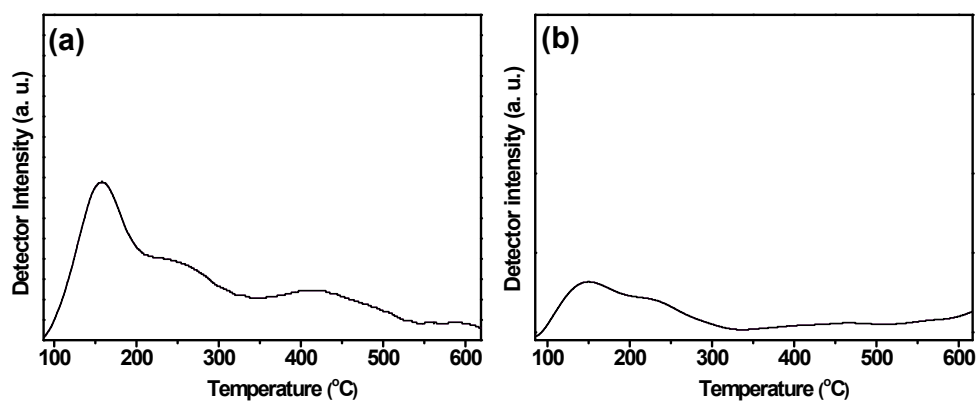

Fig. S3 (a) CO<sub>2</sub>-TPD and (b) NH<sub>3</sub>-TPD profiles of CeO<sub>2</sub>-NP.

## 7. O1s binding energy spectra

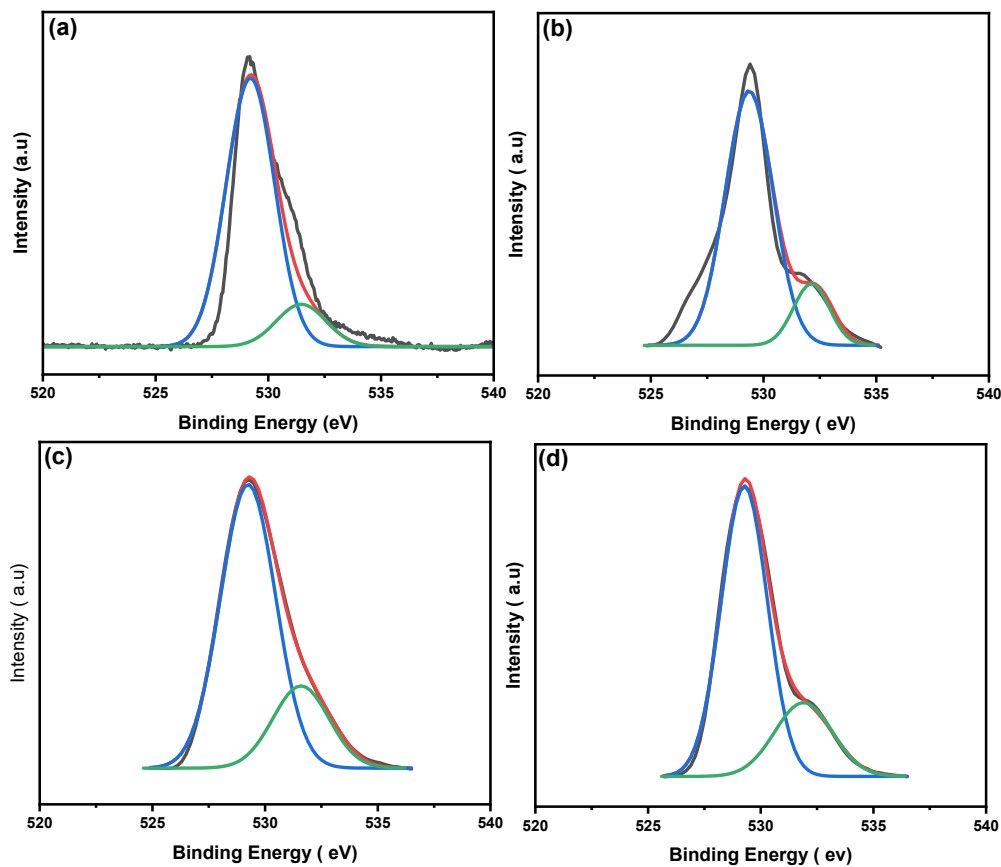

Fig. S4 O1s binding energy spectra of (a) CeO<sub>2</sub>-NP, (b) CeO<sub>2</sub>-NR, (c) S-CeO<sub>2</sub>-NR and (d) N-CeO<sub>2</sub>-NR.

## 8. Surface basicity and acidity data of the CeO<sub>2</sub> nanomaterials from CO<sub>2</sub>- and NH<sub>3</sub>-TPD

Table S4: The basicity and acidity of the CeO<sub>2</sub> nanomaterials.

| Materials              | Surface basicity <sup>a</sup> | Surface acidity <sup>b</sup> |
|------------------------|-------------------------------|------------------------------|
|                        | (Adsorbed CO <sub>2</sub> )   | (Adsorbed NH <sub>3</sub> )  |
|                        | (mmol/g)                      | (mmol/g)                     |
| CeO <sub>2</sub> -NR   | 0.109                         | 0.290                        |
| S-CeO <sub>2</sub> -NR | 0.113                         | 0.298                        |
| N-CeO <sub>2</sub> -NR | 0.130                         | 0.324                        |
| CeO <sub>2</sub> -NP   | 0.099                         | 0.048                        |

<sup>a</sup>Estimated from CO<sub>2</sub>-TPD. <sup>b</sup> Estimated from NH<sub>3</sub>-TPD.

## 9. Performances of CeO<sub>2</sub>-NP, CeO<sub>2</sub>-NR, S-CeO<sub>2</sub>-NR, N-CeO<sub>2</sub>-NR towards the catalytic synthesis of DMC

Table S5. Effect of calcination temperature on the performances of X-CeO<sub>2</sub>-NR catalysts.

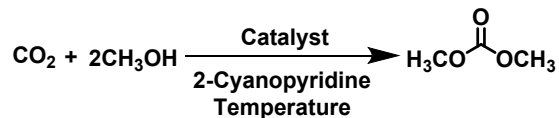

| Entry | Catalysts              | Calcination temp. (°C) | Dehydrating reagent | MeOH conversion (%) | DMC yield (mmol g <sub>cat</sub> <sup>-1</sup> ) | Selectivity (%) |                   |                  |
|-------|------------------------|------------------------|---------------------|---------------------|--------------------------------------------------|-----------------|-------------------|------------------|
|       |                        |                        |                     |                     |                                                  | DMC             | Methyl picolinate | Methyl carbamate |
| 1     | N-CeO <sub>2</sub> -NR | 300                    | 2-CP                | 1.2                 | 5.7                                              | 100             | 0                 | 0                |
| 2     | N-CeO <sub>2</sub> -NR | 500                    | 2-CP                | 4.1                 | 20.3                                             | 100             | 0                 | 0                |
| 3     | N-CeO <sub>2</sub> -NR | 600                    | 2-CP                | 22.7                | 113.3                                            | 100             | 0                 | 0                |
| 4     | N-CeO <sub>2</sub> -NR | 700                    | 2-CP                | 22.0                | 110.0                                            | 100             | 0                 | 0                |
| 5     | N-CeO <sub>2</sub> -NR | 800                    | 2-CP                | 14.3                | 70.7                                             | 100             | 0                 | 0                |
| 6     | S-CeO <sub>2</sub> -NR | 300                    | 2-CP                | 1.1                 | 5.3                                              | 100             | 0                 | 0                |
| 7     | S-CeO <sub>2</sub> -NR | 600                    | 2-CP                | 9.9                 | 49.7                                             | 100             | 0                 | 0                |

Reaction conditions: 100 mg catalyst, Methanol (3.20 g, 100 mmol), 2-cyanopyridine (2-CP: 5.20 g, 50 mmol), CO<sub>2</sub> (4 MPa), 100 °C, 2 h. The DMC yield and selectivity were estimated using <sup>1</sup>H NMR spectra.

Table S6. Effect of CO<sub>2</sub> pressure and 2-CP on the performances of N-CeO<sub>2</sub>-NR catalyst towards DMC yield.

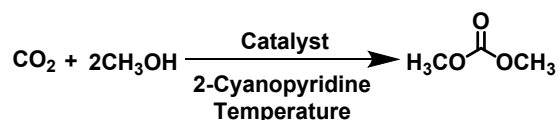

| Entry          | CO <sub>2</sub> pressure (MPa) | Dehydrating reagent | MeOH conversion (%) | DMC yield (mmol g <sub>cat</sub> <sup>-1</sup> ) | Selectivity (%) |                   |                  |
|----------------|--------------------------------|---------------------|---------------------|--------------------------------------------------|-----------------|-------------------|------------------|
|                |                                |                     |                     |                                                  | DMC             | Methyl picolinate | Methyl carbamate |
| 1 <sup>a</sup> | 4                              | 2-CP                | 22.7                | 113.3                                            | 100             | 0                 | 0                |
| 2 <sup>a</sup> | 0.4                            | 2-CP                | 11.0                | 55.2                                             | 100             | 0                 | 0                |
| 3 <sup>a</sup> | 0.1                            | 2-CP                | 0.2                 | 0.8                                              | 100             | 0                 | 0                |
| 4 <sup>b</sup> | 4                              | 2-CP                | 14.9                | 74.5                                             | 100             | 0                 | 0                |
| 5              | 4                              | -                   | 1.0                 | 4.7                                              | 100             | 0                 | 0                |

Reaction conditions: 100 mg catalyst, Methanol (3.20 g, 100 mmol), CO<sub>2</sub> (4 MPa), 100°C), 2 h. The DMC yield and selectivity were estimated using <sup>1</sup>H NMR spectra. <sup>a</sup>2-cyanopyridine (2-CP: 5.20 g, 50 mmol), <sup>b</sup>2-cyanopyridine (2-CP: 10.4 g, 100 mmol).

Table S7. Effect of reaction temperature on the performances of N-CeO<sub>2</sub>-NR catalyst.

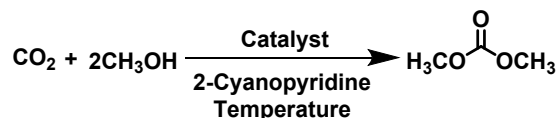

| Entry | Reaction temp. (°C) | Dehydrating reagent | MeOH conversion (%) | DMC yield (mmol $g_{cat}^{-1}$ ) | Selectivity (%) |                   |                  |
|-------|---------------------|---------------------|---------------------|----------------------------------|-----------------|-------------------|------------------|
|       |                     |                     |                     |                                  | DMC             | Methyl picolinate | Methyl carbamate |
| 1     | 100                 | 2-CP                | 22.7                | 113.3                            | 100             | 0                 | 0                |
| 2     | 120                 | 2-CP                | 39.6                | 196.7                            | 99.2            | 0.5               | 0.3              |
| 3     | 140                 | 2-CP                | 51.4                | 242.7                            | 94.4            | 3.0               | 2.6              |
| 4     | 160                 | 2-CP                | 47.9                | 190.0                            | 75.2            | 14.4              | 10.4             |

Reaction conditions: 100 mg catalyst, Methanol (3.20 g, 100 mmol), 2-cyanopyridine (2-CP: 5.20 g, 50 mmol), CO<sub>2</sub> (4 MPa), 2 h. The DMC yield and selectivity were estimated using <sup>1</sup>H NMR spectra.

Table S8. Effect of reaction time on the performances of N-CeO<sub>2</sub>-NR catalyst.

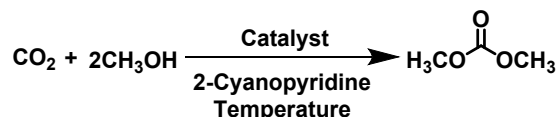

| Entry | Reaction time (h) | Dehydrating reagent | MeOH conversion (%) | DMC yield (mmol $g_{cat}^{-1}$ ) | Selectivity (%) |                   |                  |
|-------|-------------------|---------------------|---------------------|----------------------------------|-----------------|-------------------|------------------|
|       |                   |                     |                     |                                  | DMC             | Methyl picolinate | Methyl carbamate |
| 1     | 2                 | 2-CP                | 22.7                | 113.3                            | 100             | 0                 | 0                |
| 2     | 12                | 2-CP                | 42.4                | 207.7                            | 97.9            | 0.7               | 1.4              |
| 3     | 24                | 2-CP                | 33.6                | 80.7                             | 64.9            | 33.4              | 1.7              |

Reaction conditions: 100 mg catalyst, Methanol (3.20 g, 100 mmol), 2-cyanopyridine (2-CP: 5.20 g, 50 mmol), CO<sub>2</sub> (4 MPa), 100 °C. The DMC yield and selectivity were estimated using <sup>1</sup>H NMR spectra.

Table S9. Comparative catalytic efficiency of CeO<sub>2</sub> nanomaterials towards the yield of dimethyl carbonate from CO<sub>2</sub> and methanol.

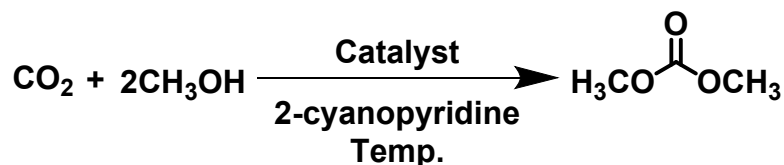

| Entry | Catalysts              | Catalyst wt. (mg) | Methanol (mmol) | 2-CP (mmol) | CO <sub>2</sub> (MPa) | Temp. (°C) | Time (h) | MeOH conv. (%) | DMC Yield (mmol $g_{cat}^{-1}$ ) | DMC Selectivity (%) |
|-------|------------------------|-------------------|-----------------|-------------|-----------------------|------------|----------|----------------|----------------------------------|---------------------|
| 1     | CeO <sub>2</sub> -NP   | 100               | 100             | 50          | 4                     | 100        | 2        | 0.2            | 0.8                              | 100                 |
| 2     | CeO <sub>2</sub> -NR   | 100               | 100             | 50          | 4                     | 100        | 2        | 5.8            | 28.8                             | 100                 |
| 3     | S-CeO <sub>2</sub> -NR | 100               | 100             | 50          | 4                     | 100        | 2        | 9.9            | 49.7                             | 100                 |
| 4     | N-CeO <sub>2</sub> -NR | 100               | 100             | 50          | 4                     | 100        | 2        | 22.7           | 113.3                            | 100                 |

#### 10. Formation of side products methyl picolinate and methyl carbamate during the synthesis of DMC

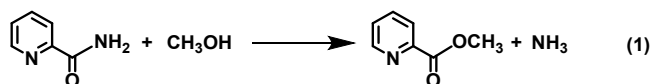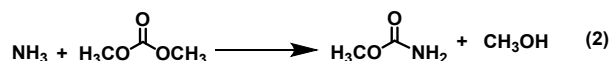

Scheme S1. The proposed routes towards the formation of side products methyl picolinate and methyl carbamate during the synthesis of DMC from CO<sub>2</sub> and methanol in the presence of 2-cyano pyridine.



## 11. Representative $^1\text{H}$ NMR spectra of standard compounds and the reaction mixture

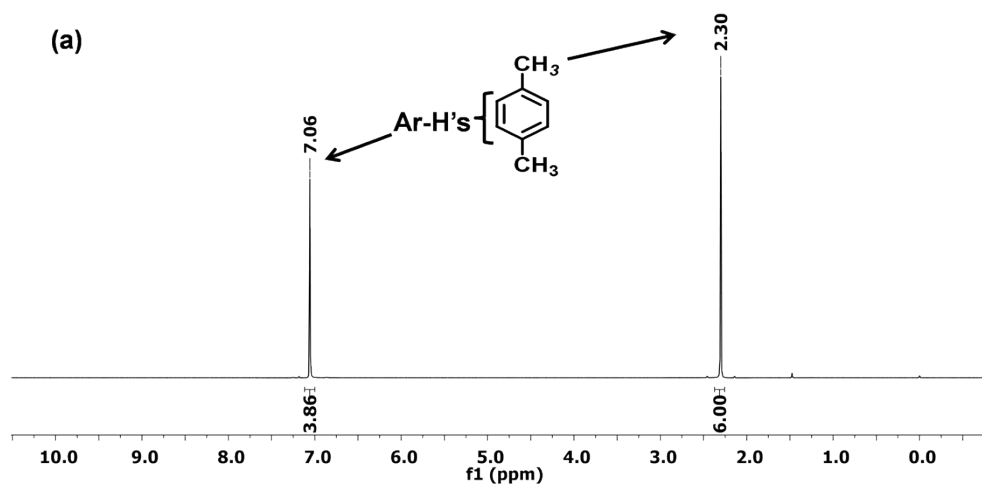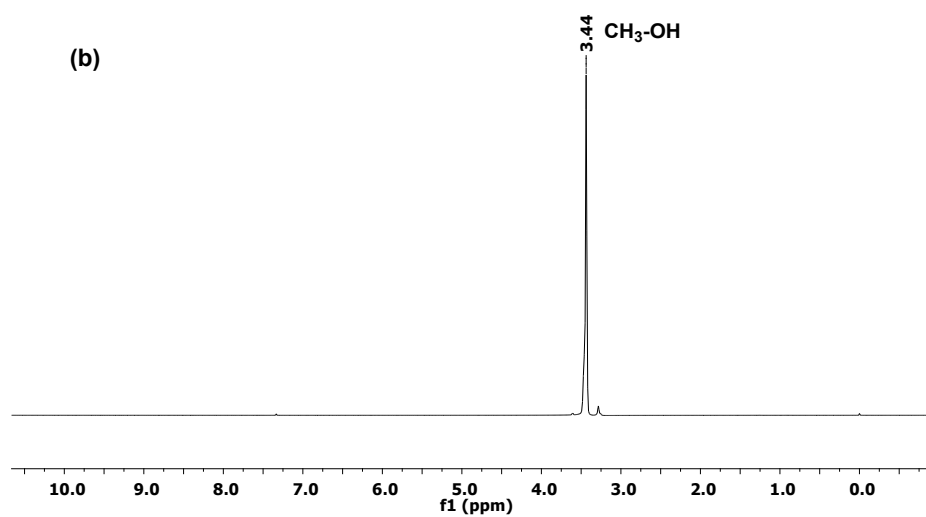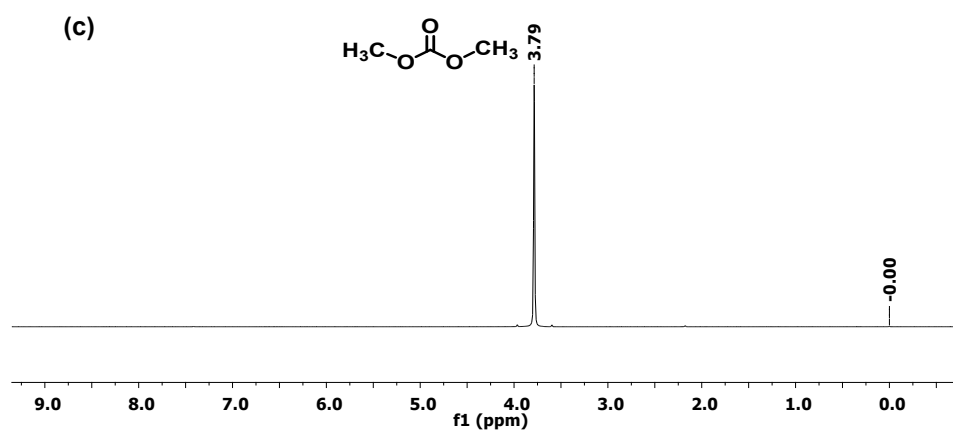

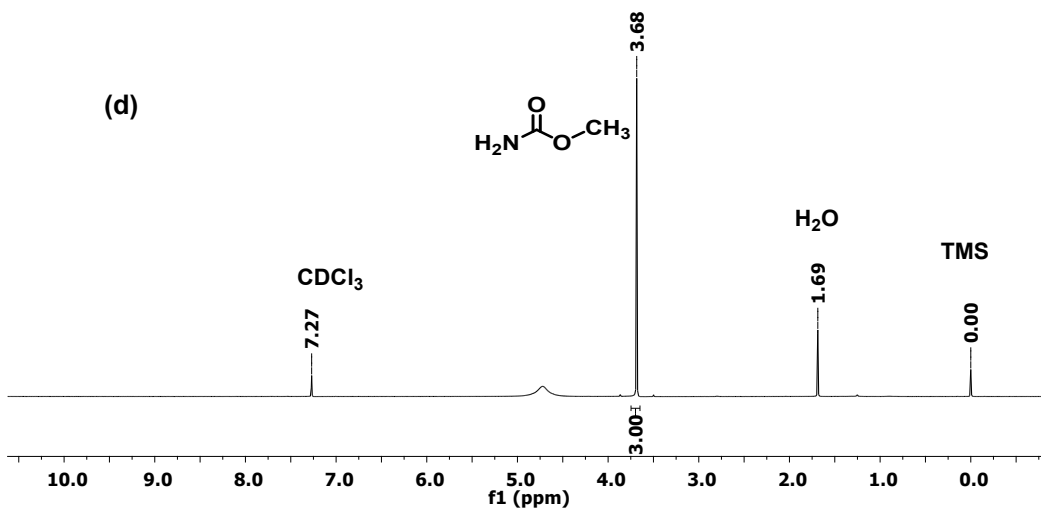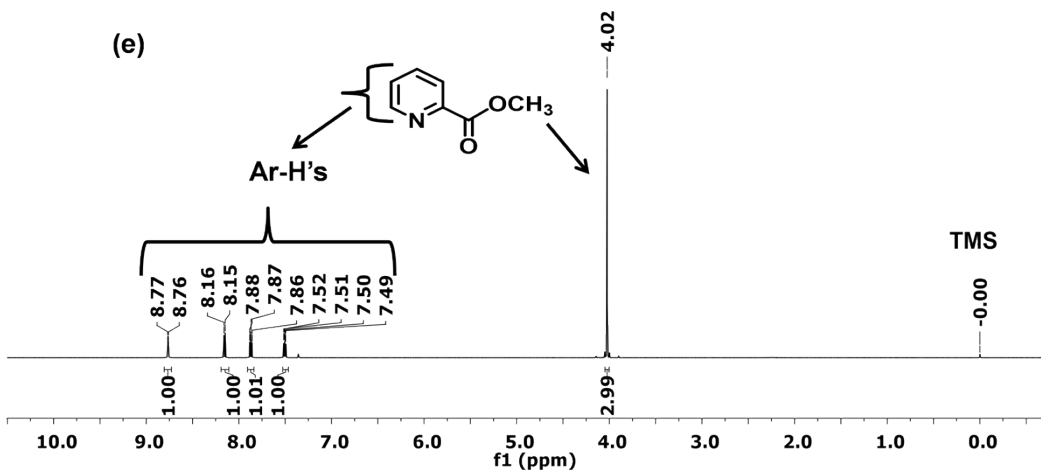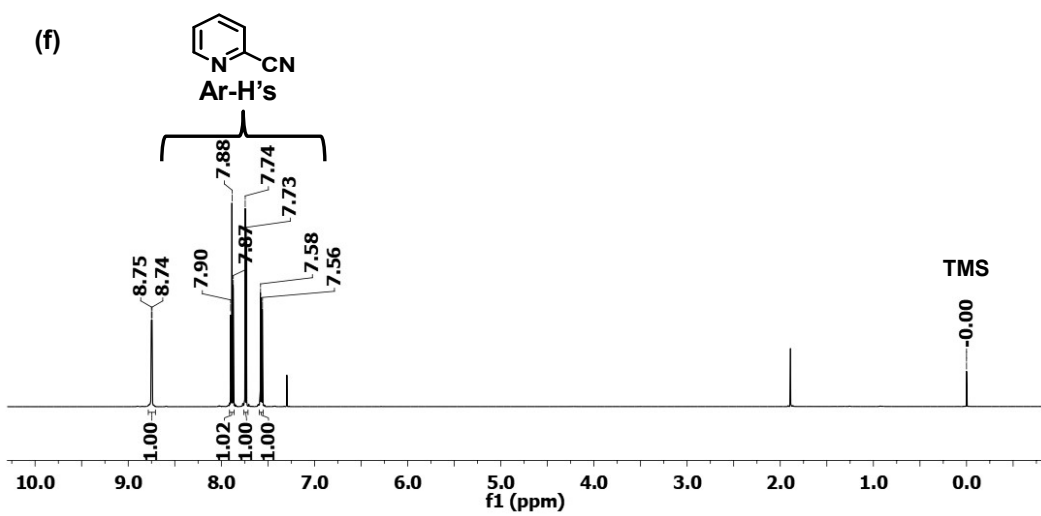

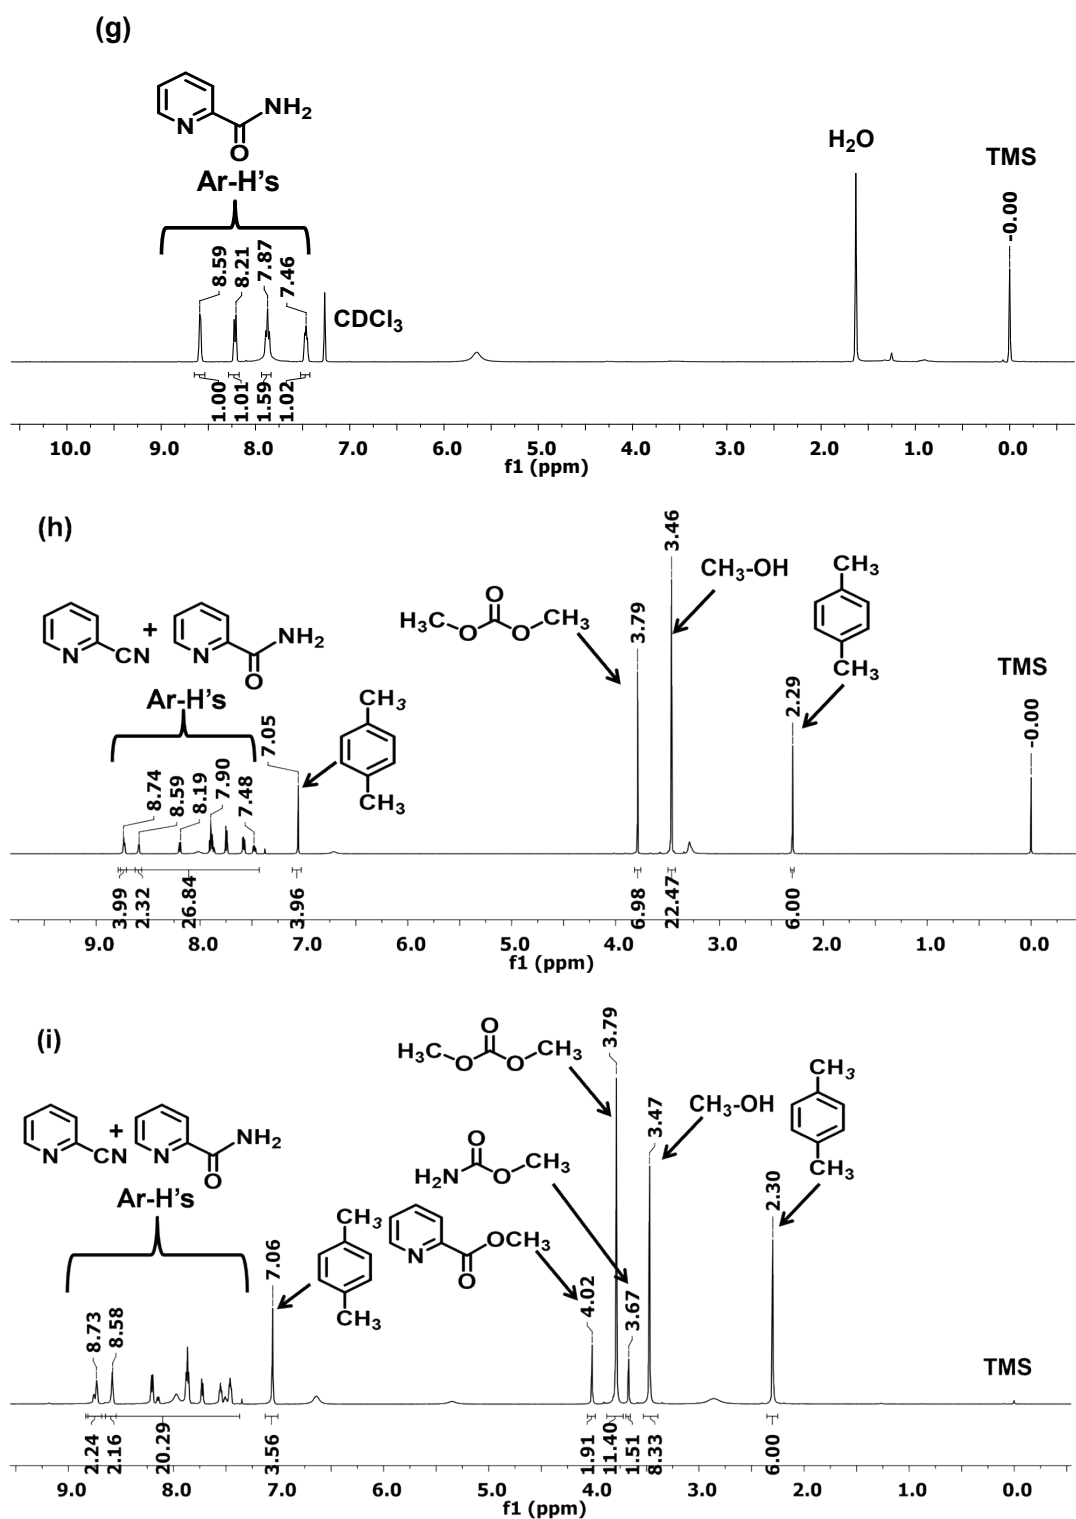

Fig. S5 <sup>1</sup>H NMR spectra of (a) *p*-Xylene, (b) methanol, (c) dimethyl carbonate, (d) methyl carbamate, (e) methyl picolinate, (f) 2-cyano pyridine, (g) piconilamide, (h) N-CeO<sub>2</sub>-NR catalyzed reaction (Table S6, Entry 1) after 2 h at 100 °C, and (i) N-CeO<sub>2</sub>-NR catalyzed reaction (Table S6, Entry 4) after 2 h at 160 °C.

## 12. The plot of surface acidity and basicity vs catalytic efficiency

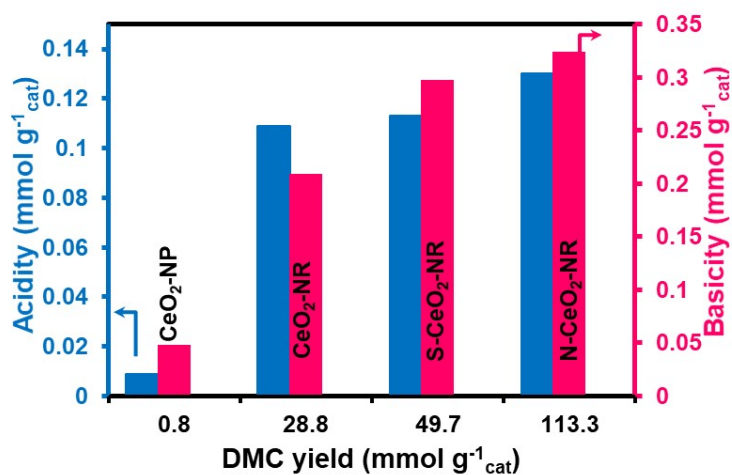

Fig. S6 Correlation between surface acidity, surface basicity and catalytic efficiency (DMC yield) of the CeO<sub>2</sub> based nanocatalysts.

## 13. Proposed reaction mechanism

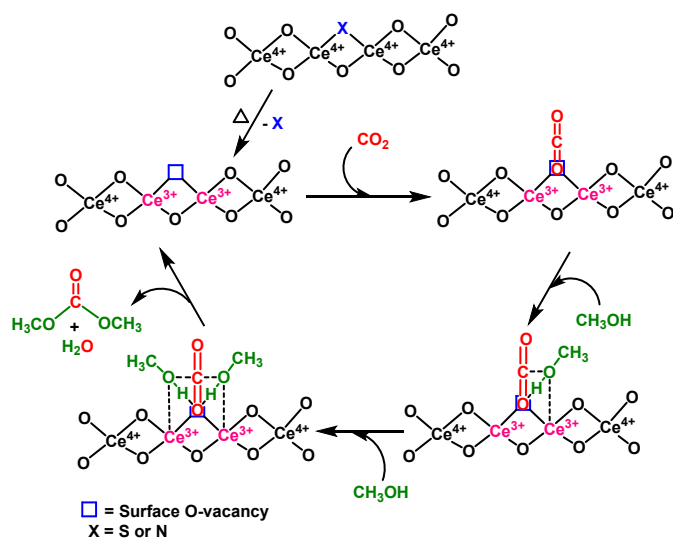

Scheme S2. Proposed reaction mechanism involving X-CeO<sub>2</sub>-NR catalysts towards the synthesis of DMC from CO<sub>2</sub> and methanol.
